# Supplementary material
Source: Springer Nature journal article supplement (https://www.springermedizin.de/resource/supplementary/13229_2013_97_MOESM3_ESM.pdf/9676158)

■ age of first seizures

■ age of individuals with ASD and epilepsy

▨ age of individuals with ASD without epilepsy

Number of children

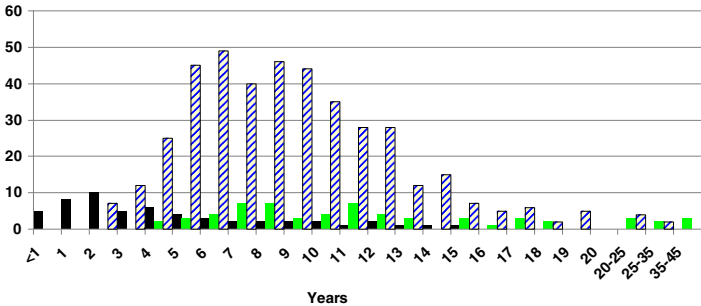

Supplement: MOESM3 [file 9676158]
